# Supplementary material for: Blood Inflammatory, Hydro-Electrolytes and Acid-Base Changes in Belgian Blue Cows Developing Parietal Fibrinous Peritonitis or Generalised Peritonitis after Caesarean Section
Source: MDPI journal article supplement (doi:10.3390/vetsci9030134), 2022-03-14
Supplement: s1 [file s1]

**Table S1.** Results (mean  $\pm$  standard deviation) and comparison of the evaluated parameters (inflammatory, chemical, venous blood gas, and metabolic parameters) in cows developing parietal fibrinous peritonitis, generalised peritonitis and the control group.

| <b><u>Inflammatory parameters</u></b>     |               | PFP (11 cows)                  | Control group<br>(14 cows)     | <i>p</i> -Value | GP (30 cows)                   | Control group<br>(14 cows)     | <i>p</i> -Value | PFP (11 cows)                  | GP (30 cows)                   | <i>p</i> -Value |
|-------------------------------------------|---------------|--------------------------------|--------------------------------|-----------------|--------------------------------|--------------------------------|-----------------|--------------------------------|--------------------------------|-----------------|
| SP (g/l)                                  | Mean $\pm$ SD | 78.45 $\pm$ 14.24 <sup>a</sup> | 68.36 $\pm$ 2.82 <sup>b</sup>  | 0.0383          | 71.33 $\pm$ 13.26 <sup>a</sup> | 68.36 $\pm$ 2.82 <sup>a</sup>  | 0.4702          | 78.45 $\pm$ 14.24 <sup>a</sup> | 71.33 $\pm$ 13.26 <sup>a</sup> | 0.0840          |
| PP (g/l)                                  | Mean $\pm$ SD | 87.09 $\pm$ 11.78 <sup>a</sup> | 71.7 $\pm$ 3.17 <sup>b</sup>   | 0.0022          | 78.97 $\pm$ 14.15 <sup>a</sup> | 71.7 $\pm$ 3.17 <sup>a</sup>   | 0.0647          | 87.09 $\pm$ 11.78 <sup>a</sup> | 78.97 $\pm$ 14.15 <sup>a</sup> | 0.0576          |
| Fibrinogen (g/l)                          | Mean $\pm$ SD | 8.64 $\pm$ 4.82 <sup>a</sup>   | 3.36 $\pm$ 0.93 <sup>b</sup>   | 0.0001          | 7.83 $\pm$ 2.45 <sup>a</sup>   | 3.36 $\pm$ 0.93 <sup>b</sup>   | 0.0001          | 8.64 $\pm$ 4.82 <sup>a</sup>   | 7.83 $\pm$ 2.45 <sup>a</sup>   | 0.4253          |
| glutaraldehyde test (min)                 |               | < 3                            | > 15                           | 0.0001          | < 3                            | > 15                           | 0.0001          | < 3                            | < 3                            | 0.1035          |
| <b><u>Chemical parameters</u></b>         |               |                                |                                |                 |                                |                                |                 |                                |                                |                 |
| Na <sup>+</sup> (mmol/L)                  | Mean $\pm$ SD | 130.9 $\pm$ 5.57 <sup>a</sup>  | 133.14 $\pm$ 2.21 <sup>a</sup> | 0.2800          | 126.93 $\pm$ 5.79 <sup>a</sup> | 133.14 $\pm$ 2.21 <sup>b</sup> | 0.0004          | 130.9 $\pm$ 5.57 <sup>a</sup>  | 126.93 $\pm$ 5.79 <sup>b</sup> | 0.0314          |
| K <sup>+</sup> (mmol/L)                   | Mean $\pm$ SD | 3.64 $\pm$ 0.25 <sup>a</sup>   | 4.48 $\pm$ 0.42 <sup>b</sup>   | 0.0393          | 3.7 $\pm$ 1.3 <sup>a</sup>     | 4.48 $\pm$ 0.42 <sup>b</sup>   | 0.0188          | 3.64 $\pm$ 0.25 <sup>a</sup>   | 3.7 $\pm$ 1.3 <sup>a</sup>     | 0.8496          |
| Ca <sup>++</sup> (mmol/L)                 | Mean $\pm$ SD | 1.06 $\pm$ 0.09 <sup>a</sup>   | 1.19 $\pm$ 0.04 <sup>b</sup>   | 0.0033          | 0.89 $\pm$ 0.12 <sup>a</sup>   | 1.19 $\pm$ 0.04 <sup>b</sup>   | 0.0001          | 1.06 $\pm$ 0.09 <sup>a</sup>   | 0.89 $\pm$ 0.12 <sup>b</sup>   | 0.0001          |
| Cl <sup>-</sup> (mmol/L)                  | Mean $\pm$ SD | 93 $\pm$ 6.15 <sup>a</sup>     | 96.93 $\pm$ 2.73 <sup>a</sup>  | 0.0918          | 82.38 $\pm$ 6.45 <sup>a</sup>  | 96.93 $\pm$ 2.73 <sup>b</sup>  | 0.0001          | 93 $\pm$ 6.15 <sup>a</sup>     | 82.38 $\pm$ 6.45 <sup>b</sup>  | 0.0001          |
| Agap (mmol/L)                             | Mean $\pm$ SD | 15 $\pm$ 4.82 <sup>a</sup>     | 15.28 $\pm$ 1.86 <sup>a</sup>  | 0.8811          | 18.82 $\pm$ 5.56 <sup>a</sup>  | 15.28 $\pm$ 1.86 <sup>b</sup>  | 0.0263          | 15 $\pm$ 4.82 <sup>a</sup>     | 18.82 $\pm$ 5.56 <sup>b</sup>  | 0.0271          |
| <b><u>Venous blood gas parameters</u></b> |               |                                |                                |                 |                                |                                |                 |                                |                                |                 |
| pH                                        | Mean $\pm$ SD | 7.73 $\pm$ 0.07 <sup>a</sup>   | 7.42 $\pm$ 0.07 <sup>a</sup>   | 0.8681          | 7.47 $\pm$ 0.08 <sup>a</sup>   | 7.42 $\pm$ 0.07 <sup>a</sup>   | 0.0708          | 7.73 $\pm$ 0.07 <sup>a</sup>   | 7.47 $\pm$ 0.08 <sup>a</sup>   | 0.1390          |
| HCO <sub>3</sub> <sup>-</sup> (mmol/L)    | Mean $\pm$ SD | 26.47 $\pm$ 4.15 <sup>a</sup>  | 25.56 $\pm$ 1.86 <sup>a</sup>  | 0.7272          | 30.87 $\pm$ 8.16 <sup>a</sup>  | 25.56 $\pm$ 1.86 <sup>b</sup>  | 0.0137          | 26.47 $\pm$ 4.15 <sup>a</sup>  | 30.87 $\pm$ 8.16 <sup>b</sup>  | 0.0476          |
| pCO <sub>2</sub> (mmHg)                   | Mean $\pm$ SD | 40.03 $\pm$ 6.29 <sup>a</sup>  | 39.76 $\pm$ 8.02 <sup>a</sup>  | 0.9241          | 40.94 $\pm$ 6.8 <sup>a</sup>   | 39.76 $\pm$ 8.02 <sup>a</sup>  | 0.6090          | 40.03 $\pm$ 6.29 <sup>a</sup>  | 40.94 $\pm$ 6.8 <sup>a</sup>   | 0.7179          |
| BE (mmol/L)                               | Mean $\pm$ SD | 1.98 $\pm$ 4.35 <sup>a</sup>   | 1.06 $\pm$ 1.51 <sup>a</sup>   | 0.7015          | 5.71 $\pm$ 7.42 <sup>a</sup>   | 1.06 $\pm$ 1.51 <sup>b</sup>   | 0.0187          | 1.98 $\pm$ 4.35 <sup>a</sup>   | 1.06 $\pm$ 1.51 <sup>a</sup>   | 0.0794          |
| <b><u>Metabolic parameters</u></b>        |               |                                |                                |                 |                                |                                |                 |                                |                                |                 |
| Glucose (mg/dL)                           | Mean $\pm$ SD | 80.36 $\pm$ 33.31 <sup>a</sup> | 74 $\pm$ 5.76 <sup>a</sup>     | 0.6334          | 86.13 $\pm$ 39.32 <sup>a</sup> | 74 $\pm$ 5.76 <sup>a</sup>     | 0.2601          | 80.36 $\pm$ 33.31 <sup>a</sup> | 86.13 $\pm$ 39.32 <sup>a</sup> | 0.6211          |
| L-lactate (mmol/L)                        | Mean $\pm$ SD | 4.68 $\pm$ 4.82 <sup>a</sup>   | 1.68 $\pm$ 1.44 <sup>a</sup>   | 0.0865          | 8.1 $\pm$ 4.85 <sup>a</sup>    | 1.68 $\pm$ 1.44 <sup>b</sup>   | 0.0001          | 4.68 $\pm$ 4.82 <sup>a</sup>   | 8.1 $\pm$ 4.85 <sup>b</sup>    | 0.0268          |
| Creatinine (mg/dL)                        | Mean $\pm$ SD | 2.33 $\pm$ 1.15 <sup>a</sup>   | 2.18 $\pm$ 0.28 <sup>a</sup>   | 0.8382          | 3.53 $\pm$ 2.30 <sup>a</sup>   | 2.18 $\pm$ 0.28 <sup>b</sup>   | 0.0240          | 2.33 $\pm$ 1.15 <sup>a</sup>   | 3.53 $\pm$ 2.30 <sup>a</sup>   | 0.0621          |

PFP: parietal fibrinous peritonitis; GP: generalised peritonitis; SP: serum protein; PP: plasma protein; Na<sup>+</sup>: sodium; K<sup>+</sup>: potassium; Cl<sup>-</sup>: chloride, Ca<sup>++</sup>: ionized calcium; (Agap) anion gap; pH: potential hydrogen, BE: base excess; HCO<sub>3</sub><sup>-</sup>: bicarbonate; pCO<sub>2</sub>: carbon dioxide pressure. Within the same line, values bearing a distinct letter are statistically different from each other ( $p < 0.05$ ).
